# Supplementary material for: Gut bacteria of adult and larval Cotinis nitida Linnaeus (Coleoptera: Scarabaeidae) demonstrate community differences according to respective life stage and gut region
Source: Frontiers journal article supplement (doi:10.3389/fmicb.2023.1185661), 2023-07-07
Supplement: Data_Sheet_1.pdf [file Data_Sheet_1.pdf]

# Supplementary Material

## Supplementary Figures and Tables

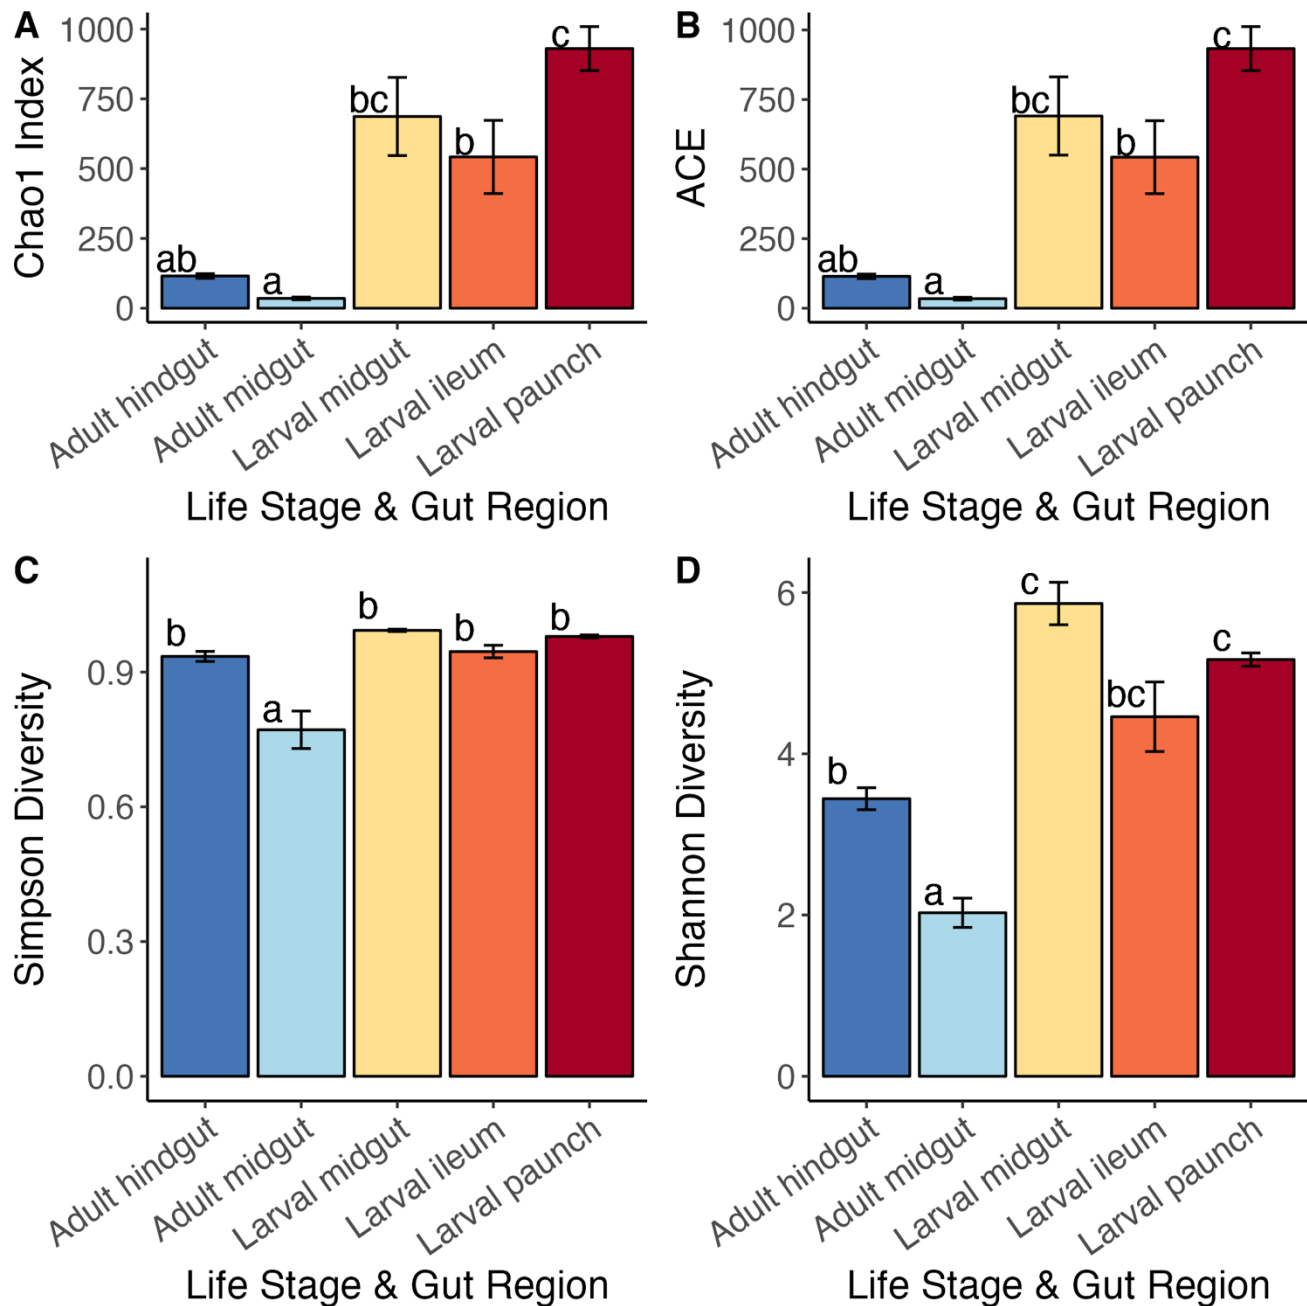

**Supplementary Figure 1.** Alpha diversity of the gut communities of adult and larval *C. nitida* as illustrated by Chao 1 (A), ACE (B), Simpson Diversity (C), and Shannon Diversity (D).

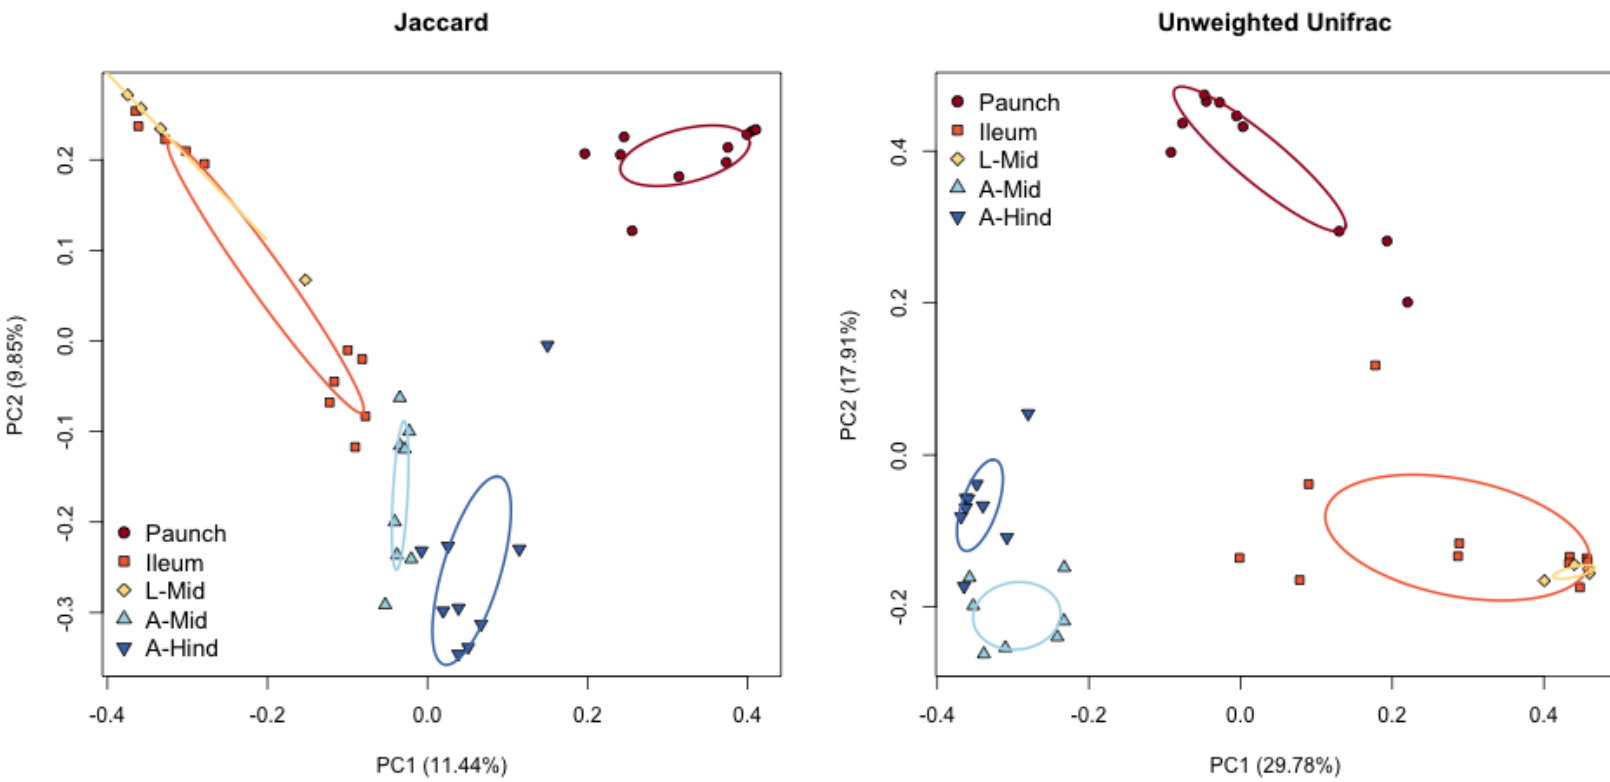

**Supplementary Figure 2.** Beta diversity of gut communities of adult and larval *C. nitida* as illustrated by Jaccard and Unweighted UniFrac.

| <u>Sample ID</u> | <u>Lifestage</u> | <u>Gut<br/>Region</u> | <u>Sex</u> | <u>Filtered<br/>reads</u> | <u>Denoised<br/>reads</u> | <u>ASV<br/>count</u> |
|------------------|------------------|-----------------------|------------|---------------------------|---------------------------|----------------------|
| All Samples      | N/A              | N/A                   | N/A        | 777,901                   | 569,124                   | 3,622                |
| Amid12           | adult            | midgut                | male       | 3,373                     | 2,834                     | 51                   |
| Amid39           | adult            | midgut                | female     | 2,954                     | 2,251                     | 25                   |
| Amid40           | adult            | midgut                | male       | 5,773                     | 4,505                     | 31                   |
| Amid41           | adult            | midgut                | male       | 2,550                     | 1,949                     | 13                   |
| Amid46           | adult            | midgut                | male       | 4,539                     | 3,567                     | 26                   |
| Amid48           | adult            | midgut                | female     | 409                       | 346                       | 15                   |
| Amid49           | adult            | midgut                | female     | 6,504                     | 5,251                     | 49                   |
| Amid7            | adult            | midgut                | male       | 1,433                     | 1,118                     | 31                   |
| hind12           | adult            | hindgut               | male       | 19,943                    | 15,704                    | 86                   |
| hind39           | adult            | hindgut               | female     | 22,202                    | 16,881                    | 71                   |
| hind4            | adult            | hindgut               | female     | 36,020                    | 29,124                    | 108                  |
| hind40           | adult            | hindgut               | male       | 35,151                    | 28,052                    | 137                  |
| hind41           | adult            | hindgut               | male       | 26,015                    | 21,089                    | 139                  |
| hind46           | adult            | hindgut               | female     | 29,546                    | 23,740                    | 125                  |
| hind48           | adult            | hindgut               | female     | 25,170                    | 19,718                    | 113                  |
| hind49           | adult            | hindgut               | female     | 16,697                    | 13,636                    | 126                  |
| hind7            | adult            | hindgut               | male       | 26,561                    | 20,485                    | 87                   |
| Ileum12          | larva            | ileum                 | N/A        | 9,215                     | 6,830                     | 345                  |

Supplementary Material

|          |       |        |     |        |        |       |
|----------|-------|--------|-----|--------|--------|-------|
| Ileum17  | larva | ileum  | N/A | 15,281 | 10,720 | 304   |
| Ileum18  | larva | ileum  | N/A | 7,369  | 5,812  | 98    |
| Ileum19  | larva | ileum  | N/A | 7,944  | 6,440  | 72    |
| Ileum2   | larva | ileum  | N/A | 9,239  | 5,524  | 668   |
| Ileum20  | larva | ileum  | N/A | 3,514  | 2,353  | 189   |
| Ileum21  | larva | ileum  | N/A | 5,061  | 3,491  | 131   |
| Ileum3   | larva | ileum  | N/A | 22,905 | 13,426 | 1,045 |
| Ileum5   | larva | ileum  | N/A | 30,525 | 19,726 | 1,061 |
| Ileum7   | larva | ileum  | N/A | 10,399 | 6,205  | 700   |
| Ileum9   | larva | ileum  | N/A | 35,260 | 20,867 | 1,234 |
| Lmid2    | larva | midgut | N/A | 9,419  | 4,887  | 747   |
| Lmid3    | larva | midgut | N/A | 11,029 | 5,817  | 845   |
| Lmid5    | larva | midgut | N/A | 2,074  | 1,214  | 266   |
| Lmid9    | larva | midgut | N/A | 12,713 | 6,246  | 839   |
| Paunch12 | larva | paunch | N/A | 29,244 | 21,892 | 848   |
| Paunch17 | larva | paunch | N/A | 35,366 | 26,009 | 831   |
| Paunch18 | larva | paunch | N/A | 41,880 | 30,281 | 984   |
| Paunch19 | larva | paunch | N/A | 38,719 | 28,897 | 770   |
| Paunch2  | larva | paunch | N/A | 30,647 | 23,035 | 1,150 |
| Paunch20 | larva | paunch | N/A | 30,541 | 22,872 | 940   |

|          |       |        |     |        |        |       |
|----------|-------|--------|-----|--------|--------|-------|
| Paunch21 | larva | paunch | N/A | 16,744 | 12,413 | 443   |
| Paunch3  | larva | paunch | N/A | 48,987 | 37,689 | 1,358 |
| Paunch5  | larva | paunch | N/A | 26,032 | 19,817 | 1,060 |
| Paunch9  | larva | paunch | N/A | 22,954 | 16,411 | 812   |

**Supplementary Table 1.** Counts of filtered and denoised reads and ASVs associated with *C. nitida* gut samples as delimited by life stage, gut region, and sex.
